# Supplementary material for: The impact of doxycycline on human contextual fear memory
Source: PubMed Central journal article supplement (PMC11031495; doi:10.1007/s00213-024-06540-w), 2024-02-09
Supplement: 213_2024_6540_MOESM1_ESM.pdf [file 213_2024_6540_MOESM1_ESM.pdf]

**Table S1**

Sample characteristics: US intensity: Electric current used in experiment; Pain ratings pre- vs. post: Difference in average pain ratings of 14 stimuli before and after the acquisition test; State Anxiety: Measured with State-Trait Anxiety Inventory (STAI) (Laux et al., 1981); Trait Anxiety: Measured with State-Trait Anxiety Inventory (STAI) (Laux et al., 1981); BDI: Beck Depression Inventory (Beck, 1996); P-value: two-sample t-test; Cohen's d: Cohen's d effect size of the group difference.

| Sex                           | Placebo  |          | Doxycycline |          | P-value | Cohen's d |
|-------------------------------|----------|----------|-------------|----------|---------|-----------|
|                               | Male     | Female   | Male        | Female   |         |           |
|                               | (n = 26) | (n = 26) | (n = 24)    | (n = 24) |         |           |
|                               | mean     | s.d.     | mean        | s.d.     |         |           |
| Age (years)                   | 23.69    | 3.60     | 23.92       | 3.99     | 0.77    | 0.06      |
| Weight (kg)                   | 68.50    | 10.15    | 69.34       | 13.89    | 0.73    | 0.07      |
| US intensity (mA)             | 4.35     | 2.15     | 4.27        | 1.58     | 0.83    | 0.04      |
| Pain rating pre- vs. post     | 12.10    | 14.52    | 9.55        | 17.81    | 0.43    | 0.16      |
| State Anxiety pre acquisition | 32.44    | 7.04     | 31.35       | 6.36     | 0.42    | 0.16      |
| State Anxiety pre recall      | 31.17    | 6.69     | 30.58       | 6.85     | 0.66    | 0.09      |
| Trait Anxiety pre acquisition | 31.90    | 7.70     | 30.96       | 5.76     | 0.49    | 0.14      |
| BDI screening                 | 1.63     | 1.93     | 1.73        | 1.92     | 0.81    | 0.05      |
| BDI post recall               | 1.79     | 3.04     | 2.63        | 3.40     | 0.20    | 0.26      |
| Temperature acquisition (°C)  | 21.89    | 1.24     | 22.14       | 0.95     | 0.25    | 0.23      |
| Temperature recall (°C)       | 22.06    | 1.16     | 22.11       | 1.08     | 0.83    | 0.04      |
| Humidity acquisition (%)      | 48.89    | 10.05    | 49.18       | 8.55     | 0.88    | 0.03      |
| Humidity recall (%)           | 49.41    | 10.02    | 50.29       | 7.96     | 0.63    | 0.10      |
| Metabolization time (min)     | 208.52   | 14.55    | 210.69      | 9.65     | 0.38    | 0.17      |

**Table S2**

Acquisition paired t-test CS+/CS- (CS- 1,2,3,4 and CS- average), not corrected for multiple comparisons

| Measure           | Group       | subsets | Conditions       | t-statistic | p      | df    | 95% CI       | cohen's d | hedge's g |
|-------------------|-------------|---------|------------------|-------------|--------|-------|--------------|-----------|-----------|
| SCR<br>DCM        | Placebo     | all     | CON+ vs. CON-    | 5.57        | <.001* | 55.98 | [0.27, 0.57] | 0.80      | 0.78      |
|                   |             | "       | CON+ vs. CON-ER  | 5.43        | <.001* | 54.45 | [0.26, 0.56] | 0.78      | 0.76      |
|                   |             | "       | CON+ vs. CXT-EA  | 5.76        | <.001* | 55.66 | [0.28, 0.59] | 0.82      | 0.81      |
|                   |             | "       | CON+ vs. CXT-    | 5.59        | <.001* | 58.93 | [0.28, 0.58] | 0.80      | 0.79      |
|                   |             | "       | CON+ vs. CS-ave. | 5.82        | <.001* | 48    | [0.28, 0.57] | 0.83      | 0.82      |
|                   | Doxycycline | all     | CON+ vs. CON-    | 6.08        | <.001* | 49    | [0.29, 0.57] | 0.91      | 0.89      |
|                   |             | "       | CON+ vs. CON-ER  | 6.00        | <.001* | 50    | [0.28, 0.56] | 0.89      | 0.88      |
|                   |             | "       | CON+ vs. CXT-EA  | 6.31        | <.001* | 50    | [0.30, 0.58] | 0.94      | 0.92      |
|                   |             | "       | CON+ vs. CXT-    | 6.51        | <.001* | 50    | [0.32, 0.60] | 0.97      | 0.95      |
|                   |             | "       | CON+ vs. CS-ave. | 6.43        | <.001* | 44    | [0.30, 0.57] | 0.96      | 0.94      |
| Pupil<br>dilation | Placebo     | all     | CON+ vs. CON-    | 5.60        | <.001* | 82    | [0.13, 0.27] | 0.82      | 0.80      |
|                   |             | "       | CON+ vs. CON-ER  | 6.27        | <.001* | 84    | [0.16, 0.30] | 0.91      | 0.90      |
|                   |             | "       | CON+ vs. CXT-EA  | 9.76        | <.001* | 74    | [0.26, 0.40] | 1.42      | 1.40      |
|                   |             | "       | CON+ vs. CXT-    | 7.96        | <.001* | 72    | [0.20, 0.33] | 1.16      | 1.14      |
|                   |             | "       | CON+ vs. CS-ave. | 8.08        | <.001* | 61    | [0.19, 0.32] | 1.18      | 1.16      |
|                   | Doxycycline | all     | CON+ vs. CON-    | 3.97        | <.001* | 60.82 | [0.09, 0.27] | 0.59      | 0.58      |
|                   |             | "       | CON+ vs. CON-ER  | 4.21        | <.001* | 70.57 | [0.10, 0.29] | 0.63      | 0.62      |
|                   |             | "       | CON+ vs. CXT-EA  | 6.04        | <.001* | 55.09 | [0.17, 0.35] | 0.90      | 0.88      |
|                   |             | "       | CON+ vs. CXT-    | 6.05        | <.001* | 58.57 | [0.18, 0.35] | 0.90      | 0.89      |
|                   |             | "       | CON+ vs. CS-ave. | 5.29        | <.001* | 52.44 | [0.14, 0.31] | 0.79      | 0.78      |

**Table S3**Acquisition independent t-test between CS+/CS- (CS- 1,2,3,4 and CS- average),  
difference for placebo and doxycycline group, not corrected for multiple comparisons

| Measure           | Group                      | subsets | Conditions       | t-statistic | p    | df    | 95% CI        | cohen's d | hedge's g |
|-------------------|----------------------------|---------|------------------|-------------|------|-------|---------------|-----------|-----------|
| SCR               | Placebo vs.<br>Doxycycline | all     | CON+ vs. CON-    | 0.05        | 0.96 | 90.72 | [-0.20, 0.21] | 0.01      | 0.01      |
|                   |                            | "       | CON+ vs. CON-ER  | 0.14        | 0.89 | 91.92 | [-0.19, 0.22] | 0.03      | 0.03      |
|                   |                            | "       | CON+ vs. CXT-EA  | 0.08        | 0.94 | 91.59 | [-0.20, 0.22] | 0.02      | 0.02      |
|                   |                            | "       | CON+ vs. CXT-    | 0.28        | 0.78 | 91.27 | [-0.17, 0.23] | 0.06      | 0.06      |
|                   |                            | "       | CON+ vs. CS-ave. | 0.14        | 0.89 | 91.95 | [-0.18, 0.21] | 0.03      | 0.03      |
| Pupil<br>dilation | Placebo vs.<br>Doxycycline | all     | CON+ vs. CON-    | -0.52       | 0.61 | 86.82 | [-0.12, 0.07] | -0.10     | -0.10     |
|                   |                            | "       | CON+ vs. CON-ER  | -0.60       | 0.55 | 86.27 | [-0.13, 0.07] | -0.12     | -0.12     |
|                   |                            | "       | CON+ vs. CXT-EA  | -1.31       | 0.19 | 81.32 | [-0.18, 0.04] | -0.27     | -0.26     |
|                   |                            | "       | CON+ vs. CXT-    | -0.03       | 0.97 | 86.39 | [-0.11, 0.11] | -0.01     | -0.01     |
|                   |                            | "       | CON+ vs. CS-ave. | -0.67       | 0.50 | 83.15 | [-0.13, 0.06] | -0.14     | -0.14     |

**Table S4**

SEBR recall paired t-test CS+/CS- (CS- 1,2,3,4 and CS- average), not corrected for multiple comparisons

| Group       | subsets | Conditions       | t-statistic | p      | df | 95% CI        | cohen's d | hedge's g |
|-------------|---------|------------------|-------------|--------|----|---------------|-----------|-----------|
| Placebo     | 1       | CON+ vs. CON-    | 2.93        | 0.005* | 47 | [0.09, 0.48]  | 0.41      | 0.41      |
|             | 1       | CON+ vs. CON-ER  | 2.86        | 0.006* | 47 | [0.06, 0.37]  | 0.40      | 0.40      |
|             | 1       | CON+ vs. CXT-EA  | 1.75        | 0.086  | 47 | [-0.03, 0.41] | 0.25      | 0.24      |
|             | 1       | CON+ vs. CXT-    | 1.75        | 0.087  | 47 | [-0.03, 0.49] | 0.25      | 0.24      |
|             | 1       | CON+ vs. CS-ave. | 2.62        | 0.012* | 47 | [0.05, 0.41]  | 0.37      | 0.36      |
|             | 1-2     | CON+ vs. CON-    | 3.24        | 0.002* | 49 | [0.08, 0.36]  | 0.46      | 0.45      |
|             | 1-2     | CON+ vs. CON-ER  | 3.41        | 0.001* | 49 | [0.09, 0.37]  | 0.48      | 0.47      |
|             | 1-2     | CON+ vs. CXT-EA  | 2.15        | 0.036* | 49 | [0.01, 0.35]  | 0.30      | 0.30      |
|             | 1-2     | CON+ vs. CXT-    | 3.02        | 0.004* | 49 | [0.09, 0.44]  | 0.43      | 0.42      |
|             | 1-2     | CON+ vs. CS-ave. | 3.39        | 0.001* | 49 | [0.09, 0.36]  | 0.48      | 0.47      |
| Doxycycline | 1       | CON+ vs. CON-    | 3.62        | 0.001* | 45 | [0.26, 0.90]  | 0.52      | 0.51      |
|             | 1       | CON+ vs. CON-ER  | 2.52        | 0.015* | 46 | [0.08, 0.70]  | 0.36      | 0.36      |
|             | 1       | CON+ vs. CXT-EA  | 4.10        | <.001* | 45 | [0.34, 0.99]  | 0.59      | 0.58      |
|             | 1       | CON+ vs. CXT-    | 3.93        | <.001* | 45 | [0.31, 0.97]  | 0.57      | 0.56      |
|             | 1       | CON+ vs. CS-ave. | 3.84        | <.001* | 46 | [0.27, 0.86]  | 0.55      | 0.55      |
|             | 1-2     | CON+ vs. CON-    | 3.63        | 0.001* | 47 | [0.24, 0.83]  | 0.52      | 0.51      |
|             | 1-2     | CON+ vs. CON-ER  | 2.54        | 0.014* | 47 | [0.07, 0.57]  | 0.37      | 0.36      |
|             | 1-2     | CON+ vs. CXT-EA  | 3.04        | 0.004* | 46 | [0.15, 0.76]  | 0.44      | 0.43      |
|             | 1-2     | CON+ vs. CXT-    | 3.72        | 0.001* | 46 | [0.23, 0.78]  | 0.54      | 0.53      |
|             | 1-2     | CON+ vs. CS-ave. | 3.58        | 0.001* | 47 | [0.21, 0.74]  | 0.52      | 0.51      |

**Table S5**

SEBR recall independent t-test between CS+/CS- (CS- 1,2,3,4 and CS- average), difference for placebo and doxycycline group, not corrected for multiple comparisons

| Measure | Group                   | subsets | Conditions       | t-statistic | p      | df | 95% CI        | cohen's d | hedge's g |
|---------|-------------------------|---------|------------------|-------------|--------|----|---------------|-----------|-----------|
| SEBR    | Doxycycline             | 1       | CON+ vs. CON-    | 1.58        | 0.12   | 92 | [-0.08, 0.66] | 0.32      | 0.32      |
|         |                         | 1       | CON+ vs. CON-ER  | 1.00        | 0.32   | 93 | [-0.17, 0.51] | 0.20      | 0.20      |
|         |                         | 1       | CON+ vs. CXT-EA  | 2.42        | 0.017* | 92 | [0.08, 0.85]  | 0.49      | 0.49      |
|         |                         | 1       | CON+ vs. CXT-    | 2.00        | 0.049* | 92 | [0.00, 0.82]  | 0.40      | 0.40      |
|         |                         | 1       | CON+ vs. CS-ave. | 1.95        | 0.054  | 93 | [-0.01, 0.67] | 0.39      | 0.39      |
|         | Placebo vs. Doxycycline | 1-2     | CON+ vs. CON-    | 1.95        | 0.054  | 96 | [-0.01, 0.63] | 0.39      | 0.39      |
|         |                         | 1-2     | CON+ vs. CON-ER  | 0.62        | 0.54   | 96 | [-0.19, 0.37] | 0.13      | 0.12      |
|         |                         | 1-2     | CON+ vs. CXT-EA  | 1.62        | 0.11   | 95 | [-0.06, 0.61] | 0.33      | 0.32      |
|         |                         | 1-2     | CON+ vs. CXT-    | 1.52        | 0.13   | 95 | [-0.07, 0.56] | 0.31      | 0.30      |
|         |                         | 1-2     | CON+ vs. CS-ave. | 1.69        | 0.093  | 96 | [-0.04, 0.54] | 0.34      | 0.34      |

**Table S6**

Pupil dilation recall paired t-test CS+/CS- (CS- 1,2,3,4 and CS- average), not corrected for multiple comparisons

| Group       | subsets | Conditions       | t-statistic | p      | df | 95% CI       | cohen's d | hedge's g |
|-------------|---------|------------------|-------------|--------|----|--------------|-----------|-----------|
| Placebo     | 1       | CON+ vs. CON-    | 2.88        | 0.006* | 48 | [0.07, 0.37] | 0.40      | 0.40      |
|             | 1       | CON+ vs. CON-ER  | 3.99        | <.001* | 45 | [0.13, 0.41] | 0.56      | 0.55      |
|             | 1       | CON+ vs. CXT-EA  | 4.95        | <.001* | 47 | [0.25, 0.59] | 0.69      | 0.68      |
|             | 1       | CON+ vs. CXT-    | 4.46        | <.001* | 46 | [0.17, 0.46] | 0.62      | 0.61      |
|             | 1       | CON+ vs. CS-ave. | 5.41        | <.001* | 48 | [0.20, 0.44] | 0.76      | 0.75      |
|             | 1-2     | CON+ vs. CON-    | 4.07        | <.001* | 49 | [0.13, 0.37] | 0.57      | 0.56      |
|             | 1-2     | CON+ vs. CON-ER  | 4.92        | <.001* | 49 | [0.18, 0.43] | 0.69      | 0.68      |
|             | 1-2     | CON+ vs. CXT-EA  | 6.41        | <.001* | 49 | [0.30, 0.58] | 0.90      | 0.88      |
|             | 1-2     | CON+ vs. CXT-    | 5.50        | <.001* | 49 | [0.22, 0.48] | 0.77      | 0.76      |
|             | 1-2     | CON+ vs. CS-ave. | 6.34        | <.001* | 50 | [0.24, 0.46] | 0.89      | 0.87      |
| Doxycycline | 1       | CON+ vs. CON-    | 4.02        | <.001* | 45 | [0.14, 0.41] | 0.59      | 0.58      |
|             | 1       | CON+ vs. CON-ER  | 6.45        | <.001* | 45 | [0.23, 0.44] | 0.94      | 0.93      |
|             | 1       | CON+ vs. CXT-EA  | 4.87        | <.001* | 45 | [0.25, 0.59] | 0.71      | 0.70      |
|             | 1       | CON+ vs. CXT-    | 4.44        | <.001* | 46 | [0.18, 0.47] | 0.65      | 0.64      |
|             | 1       | CON+ vs. CS-ave. | 5.83        | <.001* | 46 | [0.22, 0.45] | 0.85      | 0.84      |
|             | 1-2     | CON+ vs. CON-    | 4.39        | <.001* | 46 | [0.14, 0.38] | 0.64      | 0.63      |
|             | 1-2     | CON+ vs. CON-ER  | 6.57        | <.001* | 46 | [0.22, 0.41] | 0.96      | 0.94      |
|             | 1-2     | CON+ vs. CXT-EA  | 6.60        | <.001* | 46 | [0.31, 0.58] | 0.96      | 0.95      |
|             | 1-2     | CON+ vs. CXT-    | 5.52        | <.001* | 46 | [0.22, 0.47] | 0.81      | 0.79      |
|             | 1-2     | CON+ vs. CS-ave. | 6.58        | <.001* | 46 | [0.24, 0.45] | 0.96      | 0.94      |

**Table S7**

Pupil dilation recall independent t-test between CS+/CS- (CS- 1,2,3,4 and CS- average), difference for placebo and doxycycline group, not corrected for multiple comparisons

| Measure        | Group                   | subsets | Conditions       | t-statistic | p    | df | 95% CI        | cohen's d | hedge's g |
|----------------|-------------------------|---------|------------------|-------------|------|----|---------------|-----------|-----------|
| Pupil dilation | Doxycycline             | 1       | CON+ vs. CON-    | 0.59        | 0.56 | 93 | [-0.14, 0.26] | 0.12      | 0.12      |
|                |                         | 1       | CON+ vs. CON-ER  | 0.77        | 0.44 | 90 | [-0.10, 0.24] | 0.16      | 0.15      |
|                |                         | 1       | CON+ vs. CXT-EA  | 0.03        | 0.98 | 92 | [-0.24, 0.24] | 0.01      | 0.01      |
|                |                         | 1       | CON+ vs. CXT-    | 0.08        | 0.94 | 92 | [-0.19, 0.21] | 0.02      | 0.02      |
|                |                         | 1       | CON+ vs. CS-ave. | 0.20        | 0.84 | 94 | [-0.15, 0.18] | 0.04      | 0.04      |
|                | Placebo vs. Doxycycline | 1-2     | CON+ vs. CON-    | 0.15        | 0.88 | 95 | [-0.16, 0.18] | 0.03      | 0.03      |
|                |                         | 1-2     | CON+ vs. CON-ER  | 0.14        | 0.89 | 95 | [-0.14, 0.17] | 0.03      | 0.03      |
|                |                         | 1-2     | CON+ vs. CXT-EA  | 0.07        | 0.95 | 95 | [-0.19, 0.20] | 0.01      | 0.01      |
|                |                         | 1-2     | CON+ vs. CXT-    | -0.08       | 0.94 | 95 | [-0.19, 0.17] | -0.02     | -0.02     |
|                |                         | 1-2     | CON+ vs. CS-ave. | -0.06       | 0.95 | 96 | [-0.16, 0.15] | -0.01     | -0.01     |

**Table S8**

Re-learning paired t-test CS+/CS- (CS- 1,2,3,4 and CS- average), not corrected for multiple comparisons

| Measure           | Group       | subsets | Conditions       | t-statistic | p      | df    | 95% CI       | cohen's d | hedge's g |
|-------------------|-------------|---------|------------------|-------------|--------|-------|--------------|-----------|-----------|
| SCR<br>DCM        | Placebo     | all     | CON+ vs. CON-    | 5.00        | <.001* | 49.99 | [0.56, 1.30] | 0.72      | 0.71      |
|                   |             | "       | CON+ vs. CON-ER  | 5.17        | <.001* | 48.8  | [0.58, 1.33] | 0.75      | 0.73      |
|                   |             | "       | CON+ vs. CXT-EA  | 4.90        | <.001* | 49.32 | [0.54, 1.28] | 0.71      | 0.70      |
|                   |             | "       | CON+ vs. CXT-    | 4.67        | <.001* | 49.94 | [0.49, 1.24] | 0.67      | 0.66      |
|                   |             | "       | CON+ vs. CS-ave. | 5.00        | <.001* | 47    | [0.55, 1.28] | 0.72      | 0.71      |
|                   | Doxycycline | all     | CON+ vs. CON-    | 3.91        | <.001* | 47    | [0.25, 0.79] | 0.59      | 0.58      |
|                   |             | "       | CON+ vs. CON-ER  | 3.53        | 0.001* | 48    | [0.21, 0.75] | 0.53      | 0.52      |
|                   |             | "       | CON+ vs. CXT-EA  | 3.96        | <.001* | 48    | [0.26, 0.81] | 0.60      | 0.59      |
|                   |             | "       | CON+ vs. CXT-    | 4.23        | <.001* | 46    | [0.30, 0.83] | 0.64      | 0.63      |
|                   |             | "       | CON+ vs. CS-ave. | 4.00        | <.001* | 43    | [0.26, 0.79] | 0.60      | 0.59      |
| Pupil<br>dilation | Placebo     | all     | CON+ vs. CON-    | 5.95        | <.001* | 62    | [0.23, 0.46] | 0.90      | 0.88      |
|                   |             | "       | CON+ vs. CON-ER  | 6.05        | <.001* | 66    | [0.24, 0.48] | 0.91      | 0.90      |
|                   |             | "       | CON+ vs. CXT-EA  | 2.61        | 0.011* | 68    | [0.04, 0.28] | 0.39      | 0.39      |
|                   |             | "       | CON+ vs. CXT-    | 2.30        | 0.024* | 69    | [0.02, 0.26] | 0.35      | 0.34      |
|                   |             | "       | CON+ vs. CS-ave. | 4.47        | <.001* | 55    | [0.14, 0.36] | 0.67      | 0.66      |
|                   | Doxycycline | all     | CON+ vs. CON-    | 5.79        | <.001* | 57.95 | [0.21, 0.44] | 0.88      | 0.87      |
|                   |             | "       | CON+ vs. CON-ER  | 5.99        | <.001* | 62.73 | [0.23, 0.46] | 0.91      | 0.90      |
|                   |             | "       | CON+ vs. CXT-EA  | 2.90        | 0.005* | 66.56 | [0.05, 0.29] | 0.44      | 0.43      |
|                   |             | "       | CON+ vs. CXT-    | 2.73        | 0.008* | 61.95 | [0.04, 0.27] | 0.42      | 0.41      |
|                   |             | "       | CON+ vs. CS-ave. | 4.53        | <.001* | 54.71 | [0.14, 0.36] | 0.69      | 0.68      |

**Table S9**Re-learning independent t-test between CS+/CS- (CS- 1,2,3,4 and CS- average),  
difference for placebo and doxycycline group, not corrected for multiple comparisons

| Measure           | Group                      | subsets | Conditions       | t-statistic | p      | df    | 95% CI         | cohen's d | hedge's g |
|-------------------|----------------------------|---------|------------------|-------------|--------|-------|----------------|-----------|-----------|
| SCR               | Placebo vs.<br>Doxycycline | all     | CON+ vs. CON-    | -1.72       | 0.090  | 84.39 | [-0.88, 0.06]  | -0.35     | -0.35     |
|                   |                            | "       | CON+ vs. CON-ER  | -2.13       | 0.036* | 82.65 | [-0.92, -0.03] | -0.43     | -0.43     |
|                   |                            | "       | CON+ vs. CXT-EA  | -1.58       | 0.12   | 82.48 | [-0.84, 0.10]  | -0.32     | -0.32     |
|                   |                            | "       | CON+ vs. CXT-    | -1.38       | 0.17   | 86.48 | [-0.74, 0.13]  | -0.28     | -0.28     |
|                   |                            | "       | CON+ vs. CS-ave. | -1.73       | 0.087  | 83.66 | [-0.84, 0.06]  | -0.35     | -0.35     |
| Pupil<br>dilation | Placebo vs.<br>Doxycycline | all     | CON+ vs. CON-    | -0.24       | 0.81   | 85    | [-0.16, 0.12]  | -0.05     | -0.05     |
|                   |                            | "       | CON+ vs. CON-ER  | -0.11       | 0.91   | 85    | [-0.15, 0.13]  | -0.02     | -0.02     |
|                   |                            | "       | CON+ vs. CXT-EA  | 0.23        | 0.82   | 85    | [-0.14, 0.18]  | 0.05      | 0.05      |
|                   |                            | "       | CON+ vs. CXT-    | 0.18        | 0.86   | 85    | [-0.14, 0.17]  | 0.04      | 0.04      |
|                   |                            | "       | CON+ vs. CS-ave. | 0.03        | 0.98   | 84.99 | [-0.14, 0.14]  | 0.01      | 0.01      |

**Tabel S10**

LME Analysis of pupil dilation and skin conductance for fear acquisition and re-learning including CS+/US+ trials. Significant effects are marked with '\*'.

| <b>Fear acquisition</b>                             |                | Pupil dilation |                |                | Skin Conductance |                |  |
|-----------------------------------------------------|----------------|----------------|----------------|----------------|------------------|----------------|--|
| <b>Effect</b>                                       | <i>F-value</i> | <i>df</i>      | <i>p-value</i> | <i>F-value</i> | <i>df</i>        | <i>p-value</i> |  |
| Drug (doxycycline/placebo)                          | 0.18           | 1, 8246        | 0.67           | 0.05           | 1, 8681          | 0.82           |  |
| Trial number                                        | 123.17         | 1, 8246        | <.001*         | 572.05         | 1, 8681          | <.001*         |  |
| Condition (CS+/CS <sup>-</sup> <sub>1,2,3,4</sub> ) | 193.87         | 4, 8246        | <.001*         | 11.54          | 4, 8681          | <.001*         |  |
| Drug x Trial                                        | 3.36           | 1, 8246        | 0.067          | 3.01           | 1, 8681          | 0.083          |  |
| Drug x Condition                                    | 5.06           | 4, 8246        | <.001*         | 0.11           | 4, 8681          | 0.98           |  |
| Trial x Condition                                   | 5.04           | 4, 8246        | <.001*         | 1.81           | 4, 8681          | 0.12           |  |
| Drug x Trial x Condition                            | 4.80           | 4, 8246        | <.001*         | 0.98           | 4, 8681          | 0.41           |  |

  

| <b>Fear re-learning</b>                             |                | Pupil dilation |                |                | Skin Conductance |                |  |
|-----------------------------------------------------|----------------|----------------|----------------|----------------|------------------|----------------|--|
| <b>Effect</b>                                       | <i>F-value</i> | <i>df</i>      | <i>p-value</i> | <i>F-value</i> | <i>df</i>        | <i>p-value</i> |  |
| Drug (doxycycline/placebo)                          | 0.91           | 1, 3894        | 0.34           | 4.11           | 1, 4152          | 0.043*         |  |
| Trial number                                        | 8.90           | 1, 3894        | 0.003*         | 258.68         | 1, 4152          | <.001*         |  |
| Condition (CS+/CS <sup>-</sup> <sub>1,2,3,4</sub> ) | 76.58          | 4, 3894        | <.001*         | 0.33           | 4, 4152          | 0.86           |  |
| Drug x Trial                                        | 4.10           | 1, 3894        | 0.043*         | 8.54           | 1, 4152          | 0.003*         |  |
| Drug x Condition                                    | 0.31           | 4, 3894        | 0.87           | 3.99           | 4, 4152          | 0.003*         |  |
| Trial x Condition                                   | 1.20           | 4, 3894        | 0.31           | 1.40           | 4, 4152          | 0.23           |  |
| Drug x Trial x Condition                            | 0.35           | 4, 3894        | 0.85           | 0.67           | 4, 4152          | 0.62           |  |
